# Supplementary material for: Whale-Associated Microbial Communities Remain Remarkably Stable despite Massive Water Community Disruption in a Managed Artificial Marine Environment
Source: MDPI journal article supplement (doi:10.3390/oceans3030020), 2022-07-06
Supplement: s1 [file s1]

Supplementary Materials:

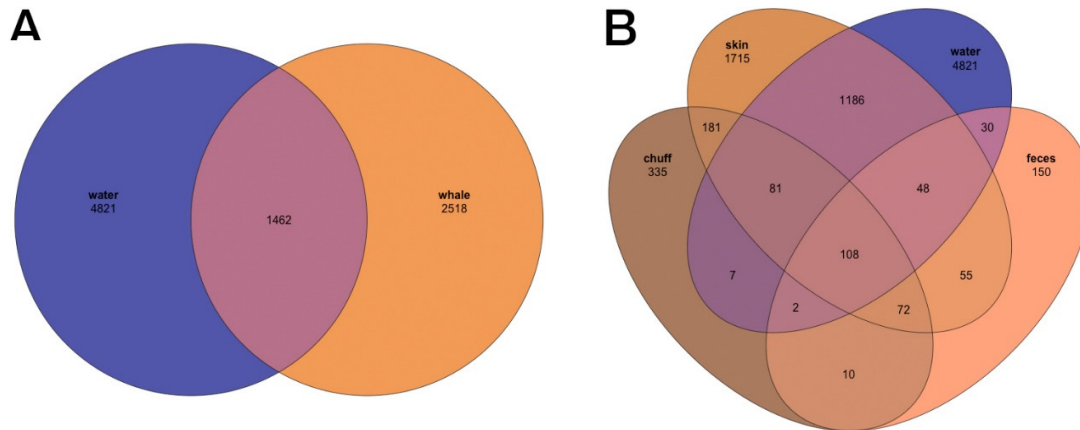

**Figure S1.** Venn diagram illustrating unique and shared ASVs by site and source.

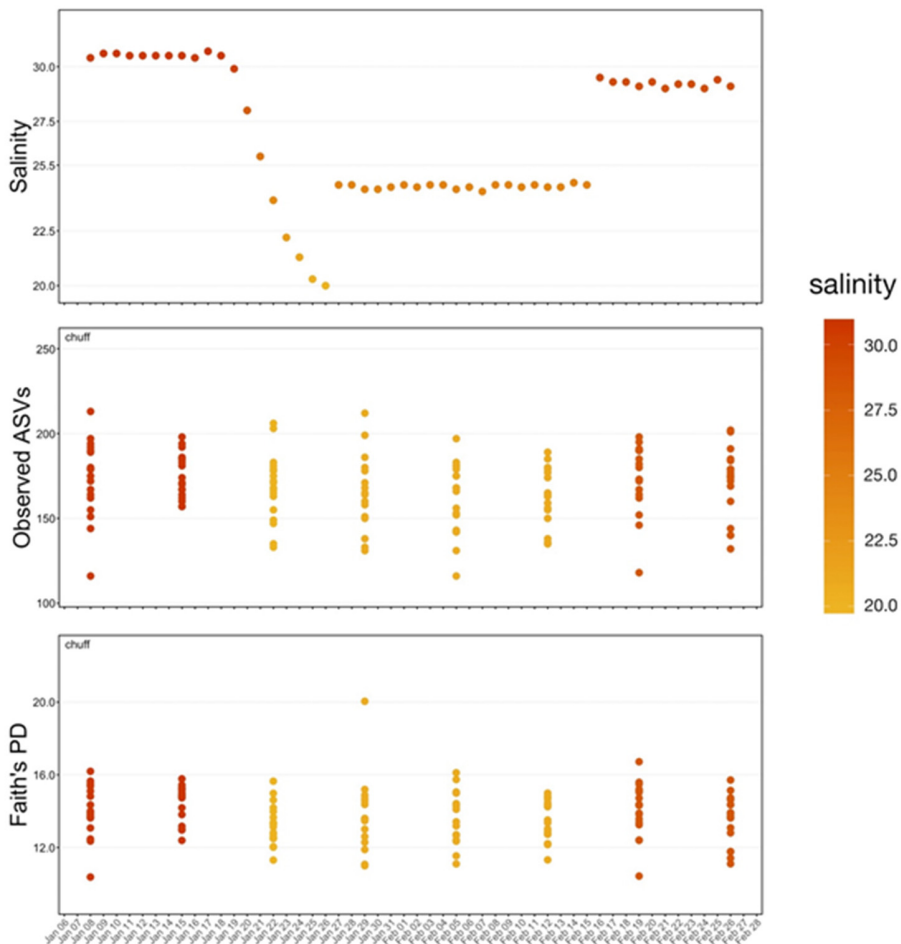

**Figure S2.** Scatterplot tracking changes on salinity (top), richness (Observed ASVs – middle), and diversity (Faith's PD – bottom) in fecal community diversity. Points are colored based on salinity values. There were no significant changes in diversity.

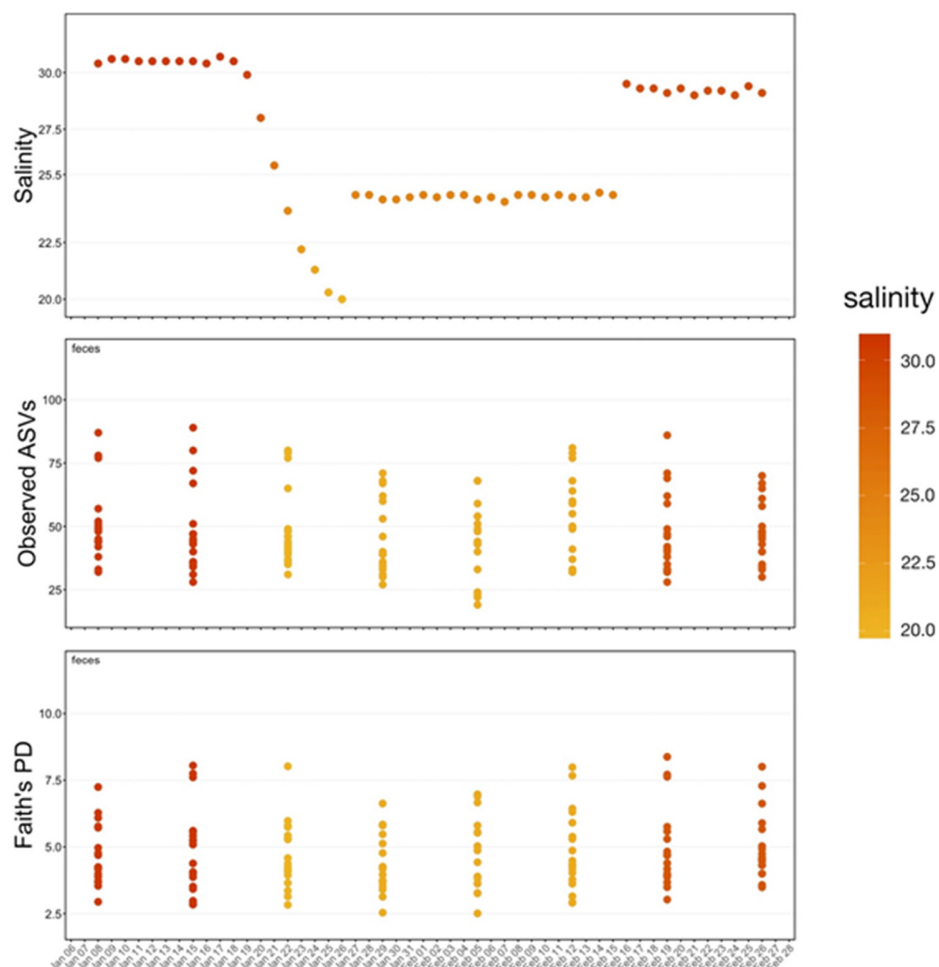

**Figure S3.** Scatterplot tracking changes on salinity (top), richness (Observed ASVs – middle), and diversity (Faith's PD – bottom) in chuff community diversity. Points are colored based on salinity values. There were no significant changes in diversity.

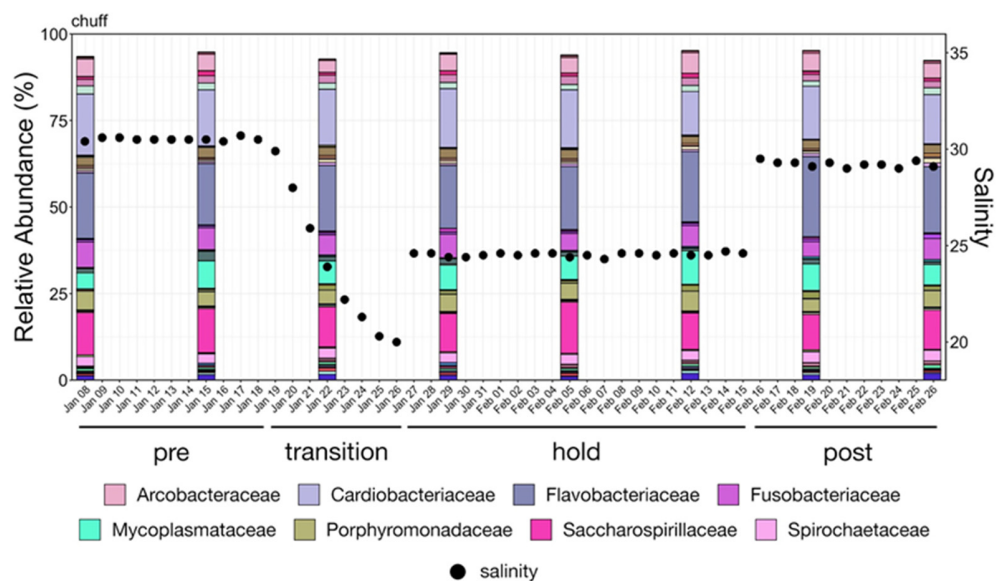

**Figure S4.** Barplot demonstrating the relative abundances of families within chuff samples throughout the water change. Salinities for each day are overlayed with black points. The 8 most abundant families across all samples are displayed in the legend.

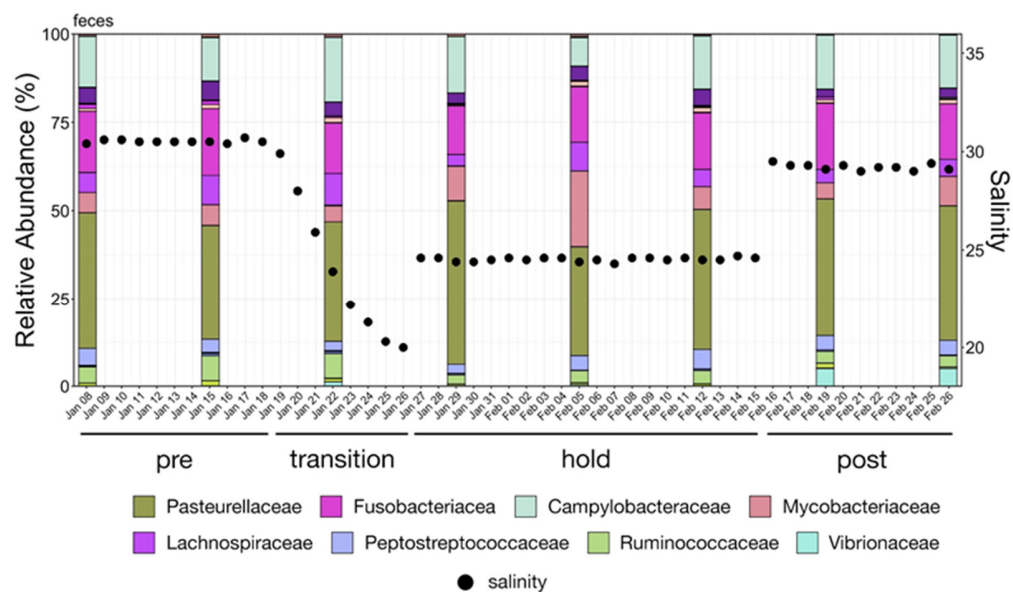

**Figure S5.** Barplot demonstrating the relative abundances of families within fecal samples throughout the water change. Salinities for each day are overlayed with black points. The 8 most abundant families across all samples are displayed in the legend.

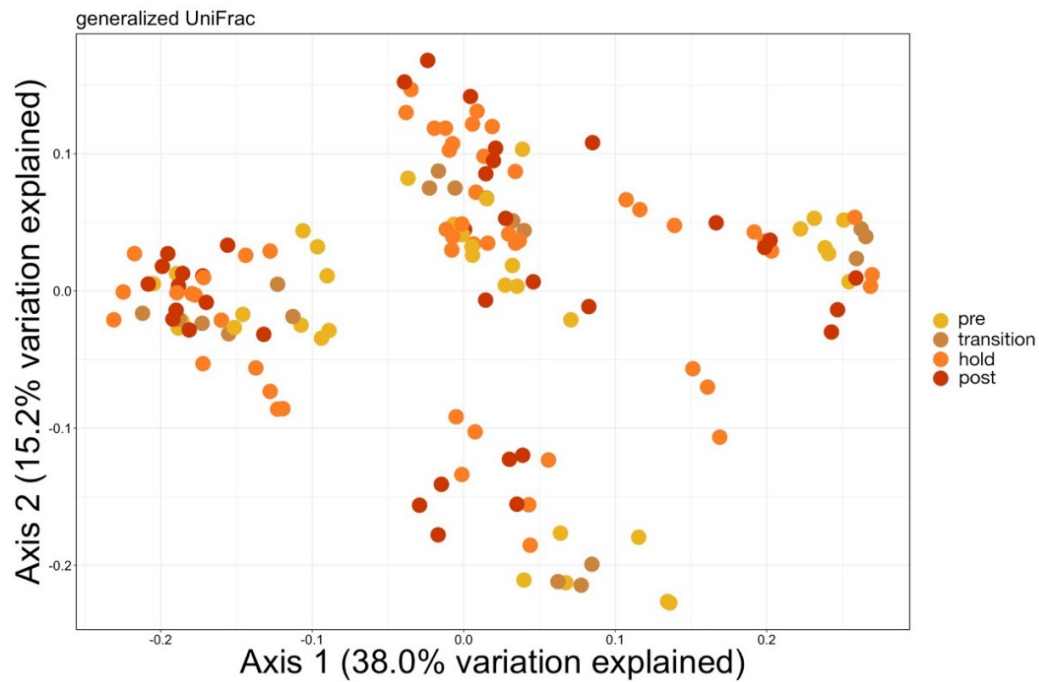

**Figure S6.** PCoA of the microbial communities from fecal samples throughout the water change. To aid visualization, samples are colored by phase opposed to salinity. There were no significant changes between phases.

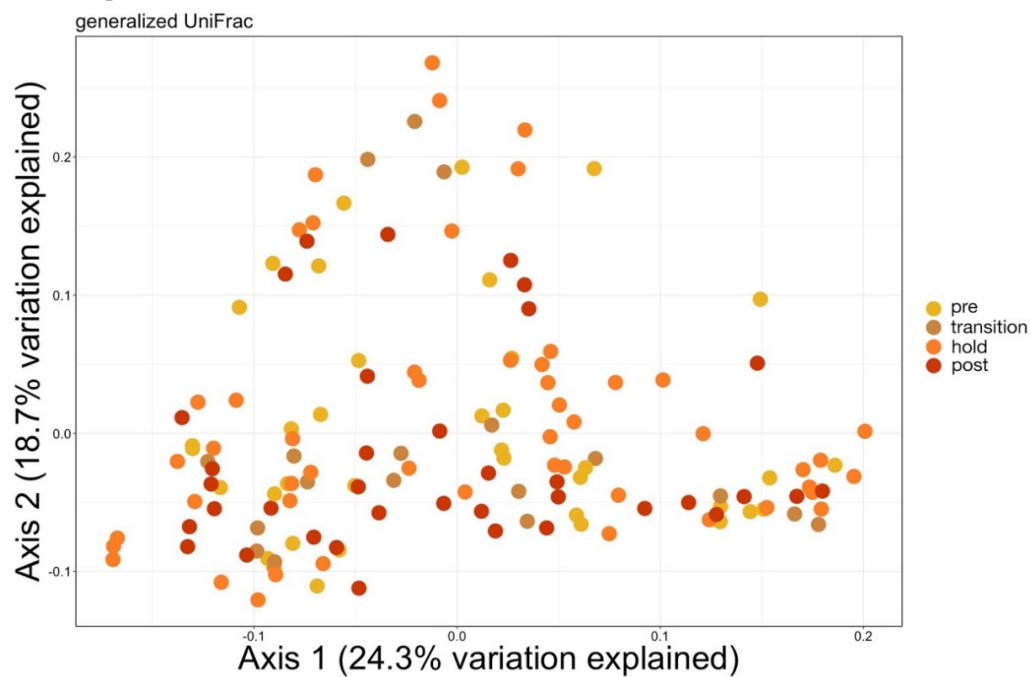

**Figure S7.** PCoA of the microbial communities from chuff samples throughout the water change. To aid visualization, samples are colored by phase opposed to salinity. There were no significant changes between phases.

**Table S1.** PERMANOVA and PERMDISP results from comparisons between microbial communities from water and those associated with different whale body sites (skin, chuff, and feces) based on generalized UniFrac values. Significant results are bolded (p-adj. < 0.05).

| Test           | Df | SS     | Pseudo-F | R <sup>2</sup> | p-adj.        | PERMDISP (p-adj.) |
|----------------|----|--------|----------|----------------|---------------|-------------------|
| water v. skin  | 1  | 12.242 | 182.269  | 0.397          | <b>0.0001</b> | <b>0.0001</b>     |
| water v. chuff | 1  | 28.157 | 702.810  | 0.709          | <b>0.0001</b> | 0.1982            |
| water v. feces | 1  | 25.190 | 558.525  | 0.657          | <b>0.0001</b> | <b>0.0090</b>     |
| skin v. chuff  | 1  | 11.211 | 168.046  | 0.384          | <b>0.0001</b> | <b>0.0001</b>     |
| skin v. feces  | 1  | 13.052 | 181.505  | 0.400          | <b>0.0001</b> | <b>0.0001</b>     |
| chuff v. feces | 1  | 20.244 | 458.771  | 0.618          | <b>0.0001</b> | <b>0.0007</b>     |

Abbreviations: v., versus; Df, degrees of freedom; SS, sum of squares; p-adj., adjusted p-value

**Table S2.** Mean relative abundance and the standard error of the mean for the top 25 most abundant taxonomic phyla, families, and genera within water microbial communities from each of the four water change phases.

| PRE                |       |       | TRANSITION         |       |       | HOLD               |       |       | POST               |       |       |
|--------------------|-------|-------|--------------------|-------|-------|--------------------|-------|-------|--------------------|-------|-------|
| Phylum             | Mean  | SEM   |
| Proteobacteria     | 77.70 | 0.718 | Proteobacteria     | 81.21 | 1.372 | Proteobacteria     | 79.52 | 0.882 | Proteobacteria     | 68.33 | 0.392 |
| Bacteroidetes      | 5.98  | 0.388 | Thaumarchaeota     | 5.86  | 0.246 | Thaumarchaeota     | 7.47  | 0.364 | Thaumarchaeota     | 11.34 | 0.245 |
| Thaumarchaeota     | 4.94  | 0.191 | Planctomycetes     | 4.62  | 0.335 | Planctomycetes     | 4.29  | 0.247 | Planctomycetes     | 7.15  | 0.140 |
| Planctomycetes     | 4.88  | 0.208 | Bacteroidetes      | 2.97  | 0.619 | Bacteroidetes      | 3.19  | 0.191 | Bacteroidetes      | 4.50  | 0.239 |
| Actinobacteria     | 0.89  | 0.076 | Actinobacteria     | 0.73  | 0.094 | Actinobacteria     | 0.81  | 0.078 | Patescibacteria    | 1.55  | 0.048 |
| Verrucomicrobia    | 0.84  | 0.066 | Chlamydiae         | 0.60  | 0.080 | Verrucomicrobia    | 0.58  | 0.038 | Actinobacteria     | 0.87  | 0.062 |
| Chlamydiae         | 0.66  | 0.030 | Patescibacteria    | 0.51  | 0.033 | Patescibacteria    | 0.58  | 0.024 | Cyanobacteria      | 0.78  | 0.025 |
| Nitrospirae        | 0.60  | 0.044 | Cyanobacteria      | 0.49  | 0.053 | Nitrospirae        | 0.51  | 0.037 | Nitrospirae        | 0.77  | 0.017 |
| Acidobacteria      | 0.51  | 0.055 | Firmicutes         | 0.49  | 0.043 | Firmicutes         | 0.49  | 0.026 | Verrucomicrobia    | 0.73  | 0.042 |
| Cyanobacteria      | 0.45  | 0.015 | Verrucomicrobia    | 0.41  | 0.097 | Cyanobacteria      | 0.41  | 0.019 | Dependentiae       | 0.67  | 0.054 |
| Firmicutes         | 0.40  | 0.034 | Nitrospirae        | 0.37  | 0.038 | Acidobacteria      | 0.39  | 0.034 | Firmicutes         | 0.62  | 0.031 |
| Patescibacteria    | 0.39  | 0.018 | Acidobacteria      | 0.36  | 0.041 | Chlamydiae         | 0.37  | 0.031 | Acidobacteria      | 0.51  | 0.026 |
| Dependentiae       | 0.34  | 0.013 | Fusobacteria       | 0.30  | 0.022 | Fusobacteria       | 0.37  | 0.019 | Fusobacteria       | 0.50  | 0.024 |
| Nitrospinae        | 0.32  | 0.014 | Dependentiae       | 0.28  | 0.024 | Dependentiae       | 0.28  | 0.021 | Chlamydiae         | 0.38  | 0.023 |
| Fusobacteria       | 0.27  | 0.016 | Nitrospinae        | 0.22  | 0.015 | Nitrospinae        | 0.16  | 0.008 | Nitrospinae        | 0.22  | 0.013 |
| uncl. Bacteria     | 0.25  | 0.017 | uncl. Bacteria     | 0.14  | 0.023 | uncl. Bacteria     | 0.11  | 0.010 | Omnitrophicaeota   | 0.18  | 0.011 |
| Omnitrophicaeota   | 0.14  | 0.011 | Chloroflexi        | 0.08  | 0.014 | Omnitrophicaeota   | 0.08  | 0.008 | uncl. Bacteria     | 0.17  | 0.010 |
| Chloroflexi        | 0.12  | 0.010 | Omnitrophicaeota   | 0.08  | 0.012 | Chloroflexi        | 0.07  | 0.008 | Lentisphaerae      | 0.16  | 0.011 |
| Dadabacteria       | 0.07  | 0.012 | Gemmatimonadetes   | 0.07  | 0.006 | Lentisphaerae      | 0.07  | 0.008 | Epsilonbacteraeota | 0.14  | 0.011 |
| Lentisphaerae      | 0.05  | 0.006 | Nanoarchaeaeota    | 0.05  | 0.005 | Epsilonbacteraeota | 0.05  | 0.005 | Dadabacteria       | 0.09  | 0.013 |
| Gemmatimonadetes   | 0.04  | 0.003 | Lentisphaerae      | 0.04  | 0.007 | Nanoarchaeaeota    | 0.04  | 0.003 | Chloroflexi        | 0.08  | 0.007 |
| Nanoarchaeaeota    | 0.03  | 0.003 | WPS-2              | 0.04  | 0.009 | Dadabacteria       | 0.04  | 0.006 | WPS-2              | 0.06  | 0.005 |
| WPS-2              | 0.03  | 0.004 | Epsilonbacteraeota | 0.03  | 0.005 | Gemmatimonadetes   | 0.03  | 0.003 | Nanoarchaeaeota    | 0.05  | 0.004 |
| Epsilonbacteraeota | 0.02  | 0.003 | Dadabacteria       | 0.03  | 0.014 | WPS-2              | 0.03  | 0.003 | Gemmatimonadetes   | 0.05  | 0.004 |
| BRC1               | 0.02  | 0.004 | BRC1               | 0.02  | 0.005 | BRC1               | 0.02  | 0.003 | Latescibacteria    | 0.01  | 0.002 |

  

| PRE                                |       |       | TRANSITION                         |       |       | HOLD              |       |       | POST                   |       |       |
|------------------------------------|-------|-------|------------------------------------|-------|-------|-------------------|-------|-------|------------------------|-------|-------|
| Family                             | Mean  | SEM   | Family                             | Mean  | SEM   | Family            | Mean  | SEM   | Family                 | Mean  | SEM   |
| Rhodobacteraceae                   | 37.49 | 0.942 | Rhodobacteraceae                   | 31.76 | 1.706 | Rhodobacteraceae  | 42.54 | 0.653 | Rhodobacteraceae       | 35.25 | 0.561 |
| Arenicellaceae                     | 15.69 | 0.495 | Cellvibrionaceae                   | 24.74 | 1.011 | Cellvibrionaceae  | 24.02 | 0.758 | Cellvibrionaceae       | 14.79 | 0.358 |
| Cellvibrionaceae                   | 10.24 | 1.231 | Arenicellaceae                     | 13.31 | 0.884 | Nitrosopumilaceae | 7.47  | 0.364 | Nitrosopumilaceae      | 11.34 | 0.245 |
| Nitrosopumilaceae                  | 4.94  | 0.191 | Nitrosopumilaceae                  | 5.86  | 0.246 | Flavobacteriaceae | 1.77  | 0.136 | Flavobacteriaceae      | 2.99  | 0.175 |
| Flavobacteriaceae                  | 3.49  | 0.243 | Flavobacteriaceae                  | 1.61  | 0.387 | Arenicellaceae    | 1.75  | 0.195 | Pirellulaceae          | 2.26  | 0.067 |
| Micavibrionaceae                   | 1.24  | 0.062 | Rubinisphaeraceae                  | 1.45  | 0.123 | Pirellulaceae     | 1.21  | 0.080 | Micavibrionaceae       | 2.24  | 0.060 |
| Saprospiraceae                     | 1.18  | 0.136 | Micavibrionaceae                   | 1.33  | 0.094 | Rubinisphaeraceae | 1.06  | 0.094 | Rubinisphaeraceae      | 1.74  | 0.054 |
| $\gamma$ -proteobacteria inc. sed. | 1.11  | 0.048 | Pirellulaceae                      | 0.90  | 0.069 | Haliaceae         | 1.04  | 0.052 | Haliaceae              | 1.60  | 0.043 |
| Rubinisphaeraceae                  | 1.02  | 0.072 | $\gamma$ -proteobacteria inc. sed. | 0.82  | 0.101 | Micavibrionaceae  | 1.02  | 0.046 | Phycisphaeraceae       | 1.16  | 0.024 |
| Nitrosomonadaceae                  | 0.93  | 0.064 | Phycisphaeraceae                   | 0.73  | 0.064 | Phycisphaeraceae  | 0.74  | 0.040 | Arenicellaceae         | 1.13  | 0.067 |
| Spongiibacteraceae                 | 0.91  | 0.068 | Legionellaceae                     | 0.65  | 0.046 | Mycobacteriaceae  | 0.65  | 0.072 | uncul. Gracilibacteria | 0.92  | 0.042 |
| Pirellulaceae                      | 0.89  | 0.041 | Mycobacteriaceae                   | 0.57  | 0.080 | Legionellaceae    | 0.63  | 0.055 | Spongiibacteraceae     | 0.86  | 0.018 |
| Phycisphaeraceae                   | 0.89  | 0.032 | Nitrosomonadaceae                  | 0.54  | 0.063 | Nitrosomonadaceae | 0.58  | 0.032 | Colwelliaceae          | 0.78  | 0.037 |

| uncl. $\gamma$ -proteobacteria     | 0.87  | 0.059 | uncl. Micavibrionales              | 0.53  | 0.034  | uncl. $\gamma$ -proteobacteria     | 0.54  | 0.028 | Nitrospiraceae                 | 0.77  | 0.017 |
|------------------------------------|-------|-------|------------------------------------|-------|--------|------------------------------------|-------|-------|--------------------------------|-------|-------|
| Haliaceae                          | 0.75  | 0.071 | Haliaceae                          | 0.49  | 0.060  | Rubritaleaceae                     | 0.53  | 0.035 | uncl. $\gamma$ -proteobacteria | 0.71  | 0.029 |
| Rubritaleaceae                     | 0.70  | 0.066 | uncl. $\gamma$ -proteobacteria     | 0.48  | 0.061  | Saprospiraceae                     | 0.52  | 0.055 | Nitrosomonadaceae              | 0.71  | 0.020 |
| Mycobacteriaceae                   | 0.63  | 0.060 | Saprospiraceae                     | 0.45  | 0.163  | Colwelliaceae                      | 0.52  | 0.038 | Rubritaleaceae                 | 0.65  | 0.041 |
| Nitrospiraceae                     | 0.60  | 0.044 | Spongiibacteraceae                 | 0.44  | 0.056  | Nitrospiraceae                     | 0.51  | 0.037 | Mycobacteriaceae               | 0.63  | 0.059 |
| Saccharospirillaceae               | 0.60  | 0.038 | Colwelliaceae                      | 0.43  | 0.037  | Spongiibacteraceae                 | 0.51  | 0.026 | uncl. Micavibrionales          | 0.62  | 0.019 |
| Shewanellaceae                     | 0.44  | 0.023 | Pasteurellaceae                    | 0.42  | 0.055  | $\gamma$ -proteobacteria inc. sed. | 0.43  | 0.022 | Pasteurellaceae                | 0.51  | 0.049 |
| uncl.                              | 0.42  | 0.017 | uncl. $\alpha$ -proteobacteria     | 0.41  | 0.028  | Pasteurellaceae                    | 0.36  | 0.022 | uncl. MBAE14                   | 0.48  | 0.031 |
| Legionellaceae                     | 0.41  | 0.025 | Simkaniaceae                       | 0.38  | 0.053  | Fusobacteriaceae                   | 0.31  | 0.017 | Vermiphilaceae                 | 0.44  | 0.056 |
| uncl. $\gamma$ -proteobacterium    | 0.39  | 0.041 | Shewanellaceae                     | 0.38  | 0.037  | uncl.                              | 0.31  | 0.012 | Fusobacteriaceae               | 0.44  | 0.024 |
| uncl. bacterium                    | 0.39  | 0.026 | Nitrospiraceae                     | 0.37  | 0.038  | Sphingomonadaceae                  | 0.30  | 0.025 | uncl. $\gamma$ -proteobacteria | 0.43  | 0.025 |
| Simkaniaceae                       | 0.38  | 0.018 | Saccharospirillaceae               | 0.31  | 0.019  | uncl. bacterium                    | 0.28  | 0.013 | Sphingomonadaceae              | 0.42  | 0.033 |
| PRE                                |       |       | TRANSITION                         |       |        | HOLD                               |       |       | POST                           |       |       |
| Genus                              | Mean  | SEM   | Genus                              | Mean  | SEM    | Genus                              | Mean  | SEM   | Genus                          | Mean  | SEM   |
| uncl. Rhodobacteraceae             | 37.17 | 0.948 | uncl. Rhodobacteraceae             | 31.39 | 1.7361 | uncl. Rhodobacteraceae             | 42.34 | 0.655 | uncl. Rhodobacteraceae         | 35.02 | 0.566 |
| Arenicella                         | 15.44 | 0.510 | uncl. Cellvibrionaceae             | 24.73 | 1.0098 | uncl. Cellvibrionaceae             | 24.00 | 0.758 | uncl. Cellvibrionaceae         | 14.76 | 0.358 |
| uncl. Cellvibrionaceae             | 10.23 | 1.231 | Arenicella                         | 13.29 | 0.8839 | Candidatus Nitrosopumilus          | 7.45  | 0.364 | Candidatus Nitrosopumilus      | 11.31 | 0.244 |
| Candidatus Nitrosopumilus          | 4.92  | 0.190 | Candidatus Nitrosopumilus          | 5.84  | 0.2451 | Arenicella                         | 1.69  | 0.199 | uncl. Micavibrionaceae         | 2.24  | 0.060 |
| uncl. Micavibrionaceae             | 1.24  | 0.062 | uncl. Rubinisphaeraceae            | 1.38  | 0.1229 | uncl. Micavibrionaceae             | 1.02  | 0.046 | uncl. Rubinisphaeraceae        | 1.57  | 0.051 |
| Tenacibaculum                      | 0.97  | 0.044 | uncl. Micavibrionaceae             | 1.33  | 0.0940 | uncl. Rubinisphaeraceae            | 0.94  | 0.086 | Parahalia                      | 1.12  | 0.022 |
| Nitrosomonas                       | 0.93  | 0.064 | $\gamma$ -proteobacteria inc. sed. | 0.68  | 0.0786 | Parahalia                          | 0.68  | 0.035 | Arenicella                     | 1.02  | 0.067 |
| uncl. Rubinisphaeraceae            | 0.91  | 0.066 | uncl. Legionellaceae               | 0.59  | 0.0419 | Mycobacterium                      | 0.65  | 0.072 | Tenacibaculum                  | 0.94  | 0.026 |
| uncl. $\gamma$ -proteobacteria     | 0.87  | 0.059 | Mycobacterium                      | 0.57  | 0.0797 | uncl. Legionellaceae               | 0.60  | 0.055 | uncl. Gracilibacteria          | 0.92  | 0.042 |
| uncl. Flavobacteriaceae            | 0.85  | 0.080 | Tenacibaculum                      | 0.57  | 0.0624 | Nitrosomonas                       | 0.58  | 0.032 | uncl. Flavobacteriaceae        | 0.86  | 0.093 |
| $\gamma$ -proteobacteria inc. sed. | 0.72  | 0.036 | Nitrosomonas                       | 0.54  | 0.0634 | Tenacibaculum                      | 0.55  | 0.038 | Blastopirellula                | 0.79  | 0.023 |
| BD1-7 clade                        | 0.71  | 0.046 | uncl. $\gamma$ -proteobacteria     | 0.48  | 0.0607 | uncl. Flavobacteriaceae            | 0.55  | 0.049 | Colwellia                      | 0.78  | 0.037 |
| Mycobacterium                      | 0.63  | 0.060 | uncl. Micavibrionales              | 0.45  | 0.0299 | uncl. $\gamma$ -proteobacteria     | 0.54  | 0.028 | Nitrospira                     | 0.77  | 0.017 |
| Nitrospira                         | 0.60  | 0.044 | Colwellia                          | 0.42  | 0.0363 | Colwellia                          | 0.52  | 0.038 | uncl. $\gamma$ -proteobacteria | 0.71  | 0.029 |
| Lewinella                          | 0.60  | 0.071 | uncl. Alphaproteobacteria          | 0.41  | 0.0281 | Nitrospira                         | 0.51  | 0.037 | Nitrosomonas                   | 0.71  | 0.020 |
| Oleispira                          | 0.57  | 0.035 | Actinobacillus                     | 0.41  | 0.0540 | Blastopirellula                    | 0.49  | 0.027 | Mycobacterium                  | 0.63  | 0.059 |
| Formosa                            | 0.50  | 0.040 | uncl. Flavobacteriaceae            | 0.39  | 0.1244 | Haloferula                         | 0.36  | 0.028 | Bythopirellula                 | 0.63  | 0.021 |
| uncl. Saprospiraceae               | 0.44  | 0.052 | BD1-7 clade                        | 0.39  | 0.0472 | Actinobacillus                     | 0.35  | 0.022 | BD1-7 clade                    | 0.61  | 0.014 |
| Haloferula                         | 0.43  | 0.048 | Blastopirellula                    | 0.38  | 0.0275 | BD1-7 clade                        | 0.34  | 0.013 | Pir4 lineage                   | 0.58  | 0.021 |
| uncl. MBAE14                       | 0.39  | 0.041 | uncl. Simkaniaceae                 | 0.37  | 0.0511 | Lewinella                          | 0.31  | 0.046 | Actinobacillus                 | 0.49  | 0.050 |
| uncl. bacterium                    | 0.39  | 0.026 | Nitrospira                         | 0.37  | 0.0378 | Bythopirellula                     | 0.31  | 0.025 | uncl. MBAE14                   | 0.48  | 0.031 |
| Phycisphaera                       | 0.38  | 0.018 | Shewanella                         | 0.35  | 0.0312 | Fusobacterium                      | 0.31  | 0.017 | SM1A02                         | 0.44  | 0.013 |
| uncl.                              | 0.37  | 0.017 | Phycisphaera                       | 0.31  | 0.0313 | uncl. bacterium                    | 0.28  | 0.013 | uncultured bacterium           | 0.44  | 0.056 |
| uncl. planctomycete                | 0.37  | 0.028 | Coxiella                           | 0.30  | 0.0212 | SM1A02                             | 0.27  | 0.018 | Fusobacterium                  | 0.44  | 0.024 |
| Blastopirellula                    | 0.36  | 0.019 | Oleispira                          | 0.29  | 0.0165 | Pir4 lineage                       | 0.27  | 0.021 | uncultured bacterium           | 0.43  | 0.016 |

Abbreviations: uncl., unclassified; uncul., uncultured.

**Table S3.** Mean relative abundance and the standard error of the mean for the top 25 most abundant taxonomic phyla, families, and genera within skin microbial communities from each of the four water change phases.

| PRE    |      |     | TRANSITION |      |     | HOLD   |      |     | POST   |      |     |
|--------|------|-----|------------|------|-----|--------|------|-----|--------|------|-----|
| Phylum | Mean | SEM | Phylum     | Mean | SEM | Phylum | Mean | SEM | Phylum | Mean | SEM |

|                     |       |       |                     |       |       |                     |       |       |                     |       |       |
|---------------------|-------|-------|---------------------|-------|-------|---------------------|-------|-------|---------------------|-------|-------|
| Proteobacteria      | 76.89 | 2.187 | Proteobacteria      | 78.86 | 3.285 | Proteobacteria      | 74.00 | 2.084 | Proteobacteria      | 70.82 | 3.181 |
| Bacteroidetes       | 18.53 | 2.224 | Bacteroidetes       | 17.32 | 3.069 | Bacteroidetes       | 18.14 | 1.884 | Bacteroidetes       | 20.03 | 2.828 |
| Verrucomicrobia     | 0.78  | 0.161 | Fusobacteria        | 1.09  | 0.419 | Fusobacteria        | 1.77  | 0.489 | Epsilonbacteraeota  | 2.01  | 1.280 |
| Planctomycetes      | 0.68  | 0.097 | Planctomycetes      | 0.49  | 0.129 | Epsilonbacteraeota  | 1.17  | 0.331 | Actinobacteria      | 1.26  | 0.307 |
| Firmicutes          | 0.60  | 0.272 | Firmicutes          | 0.33  | 0.120 | Actinobacteria      | 1.07  | 0.260 | Fusobacteria        | 1.21  | 0.431 |
| Fusobacteria        | 0.46  | 0.181 | Thaumarchaeota      | 0.33  | 0.099 | Firmicutes          | 1.02  | 0.440 | Firmicutes          | 0.88  | 0.234 |
| Actinobacteria      | 0.42  | 0.091 | Actinobacteria      | 0.31  | 0.121 | Planctomycetes      | 0.68  | 0.100 | Patescibacteria     | 0.69  | 0.107 |
| Epsilonbacteraeota  | 0.32  | 0.164 | Tenericutes         | 0.30  | 0.176 | Tenericutes         | 0.53  | 0.281 | Verrucomicrobia     | 0.54  | 0.092 |
| Thaumarchaeota      | 0.28  | 0.049 | Epsilonbacteraeota  | 0.25  | 0.144 | Verrucomicrobia     | 0.40  | 0.082 | Dependentiae        | 0.51  | 0.136 |
| unassigned Bacteria | 0.26  | 0.061 | Chloroflexi         | 0.16  | 0.067 | Patescibacteria     | 0.30  | 0.072 | Planctomycetes      | 0.36  | 0.068 |
| Patescibacteria     | 0.19  | 0.055 | Patescibacteria     | 0.14  | 0.056 | Thaumarchaeota      | 0.27  | 0.041 | unassigned Bacteria | 0.31  | 0.110 |
| Chloroflexi         | 0.15  | 0.039 | Nitrospirae         | 0.08  | 0.076 | Cyanobacteria       | 0.12  | 0.052 | WPS-2               | 0.31  | 0.178 |
| Dependentiae        | 0.08  | 0.015 | unassigned Bacteria | 0.08  | 0.026 | Spirochaetes        | 0.10  | 0.039 | Thaumarchaeota      | 0.30  | 0.065 |
| Tenericutes         | 0.07  | 0.032 | Spirochaetes        | 0.07  | 0.041 | unassigned Bacteria | 0.10  | 0.016 | Tenericutes         | 0.25  | 0.075 |
| Acidobacteria       | 0.07  | 0.026 | Chlamydiae          | 0.06  | 0.043 | Acidobacteria       | 0.07  | 0.025 | Spirochaetes        | 0.22  | 0.070 |
| Cyanobacteria       | 0.07  | 0.017 | Verrucomicrobia     | 0.05  | 0.017 | Euryarchaeota       | 0.07  | 0.062 | Cyanobacteria       | 0.14  | 0.037 |
| Nitrospirae         | 0.04  | 0.011 | Dependentiae        | 0.04  | 0.021 | Dependentiae        | 0.05  | 0.014 | Acidobacteria       | 0.04  | 0.016 |
| WPS-2               | 0.04  | 0.013 | Omnitrophicaeota    | 0.02  | 0.015 | Nitrospirae         | 0.05  | 0.014 | Chloroflexi         | 0.03  | 0.014 |
| Chlamydiae          | 0.02  | 0.005 | Acidobacteria       | 0.01  | 0.005 | Chloroflexi         | 0.04  | 0.009 | Chlamydiae          | 0.03  | 0.008 |
| Spirochaetes        | 0.01  | 0.007 | WPS-2               | 0.01  | 0.003 | Chlamydiae          | 0.02  | 0.006 | Nanoarchaeaeota     | 0.01  | 0.011 |
| Omnitrophicaeota    | 0.01  | 0.005 | Lentisphaerae       | <0.01 | 0.003 | Lentisphaerae       | 0.01  | 0.005 | Nitrospirae         | 0.01  | 0.006 |
| Fibrobacteres       | 0.01  | 0.007 | Cyanobacteria       | <0.01 | 0.002 | Omnitrophicaeota    | 0.01  | 0.003 | Omnitrophicaeota    | 0.01  | 0.006 |
| Nanoarchaeaeota     | 0.01  | 0.005 | Deinococcus-Thermus | <0.01 | 0.002 | Gemmatimonadetes    | 0.01  | 0.003 | BRC1                | 0.01  | 0.005 |
| Lentisphaerae       | 0.01  | 0.004 | Euryarchaeota       | <0.01 | 0.002 | Dadabacteria        | <0.01 | 0.002 | Lentisphaerae       | <0.01 | 0.004 |
| Elusimicrobia       | <0.01 | 0.003 | Nanoarchaeaeota     | <0.01 | 0.001 | Nanoarchaeaeota     | <0.01 | 0.003 | PAUC34f             | <0.01 | 0.004 |

| PRE                            |       |       | TRANSITION           |       |       | HOLD                               |       |       | POST                           |       |       |
|--------------------------------|-------|-------|----------------------|-------|-------|------------------------------------|-------|-------|--------------------------------|-------|-------|
| Family                         | Mean  | SEM   | Family               | Mean  | SEM   | Family                             | Mean  | SEM   | Family                         | Mean  | SEM   |
| Rhodobacteraceae               | 26.84 | 2.923 | Rhodobacteraceae     | 28.96 | 6.620 | Rhodobacteraceae                   | 32.55 | 3.337 | Rhodobacteraceae               | 23.43 | 3.430 |
| Flavobacteriaceae              | 15.84 | 2.241 | Saccharospirillaceae | 17.11 | 5.716 | Flavobacteriaceae                  | 14.43 | 1.730 | Flavobacteriaceae              | 16.33 | 2.797 |
| Saccharospirillaceae           | 15.40 | 3.795 | Moraxellaceae        | 16.72 | 4.990 | Saccharospirillaceae               | 6.82  | 1.741 | Moraxellaceae                  | 11.10 | 3.403 |
| Moraxellaceae                  | 6.34  | 1.331 | Flavobacteriaceae    | 15.45 | 3.060 | Moraxellaceae                      | 6.65  | 1.593 | Pasteurellaceae                | 6.14  | 1.778 |
| Arenicellaceae                 | 5.99  | 0.998 | Cardiobacteriaceae   | 5.16  | 2.017 | Pasteurellaceae                    | 5.25  | 1.170 | Sphingomonadaceae              | 4.83  | 1.108 |
| Cardiobacteriaceae             | 3.82  | 1.148 | Burkholderiaceae     | 3.28  | 1.339 | Cardiobacteriaceae                 | 3.25  | 0.706 | Cardiobacteriaceae             | 2.93  | 0.711 |
| Pasteurellaceae                | 2.87  | 1.170 | Pasteurellaceae      | 2.47  | 0.851 | Burkholderiaceae                   | 2.83  | 0.373 | uncl. $\gamma$ -proteobacteria | 2.08  | 0.941 |
| Spongiibacteraceae             | 2.32  | 0.548 | Leptotrichiaceae     | 0.94  | 0.375 | Saprospiraceae                     | 2.29  | 0.424 | Alteromonadaceae               | 1.94  | 0.446 |
| uncl. MBAE14                   | 1.94  | 0.486 | Haliaceae            | 0.65  | 0.183 | Arenicellaceae                     | 2.06  | 0.489 | Burkholderiaceae               | 1.93  | 0.319 |
| Sphingomonadaceae              | 1.31  | 0.318 | Alteromonadaceae     | 0.52  | 0.105 | Sphingomonadaceae                  | 1.67  | 0.365 | Campylobacteraceae             | 1.75  | 1.231 |
| Saprospiraceae                 | 1.30  | 0.245 | Saprospiraceae       | 0.48  | 0.143 | Haliaceae                          | 1.61  | 0.253 | Saccharospirillaceae           | 1.74  | 0.466 |
| Alteromonadaceae               | 1.27  | 0.239 | Colwelliaceae        | 0.46  | 0.198 | Fusobacteriaceae                   | 1.21  | 0.422 | Arenicellaceae                 | 1.70  | 0.354 |
| uncl. $\gamma$ -proteobacteria | 1.14  | 0.334 | Cellvibrionaceae     | 0.43  | 0.167 | Spongiibacteraceae                 | 1.20  | 0.148 | uncl. MBAE14                   | 1.57  | 0.329 |
| Weeksellaceae                  | 0.83  | 0.364 | Porphyromonadaceae   | 0.39  | 0.271 | Colwelliaceae                      | 1.14  | 0.651 | Hyphomonadaceae                | 1.30  | 0.333 |
| Rhizobiaceae                   | 0.72  | 0.310 | Sphingomonadaceae    | 0.35  | 0.143 | Cellvibrionaceae                   | 0.96  | 0.176 | Saprospiraceae                 | 1.23  | 0.344 |
| Burkholderiaceae               | 0.71  | 0.255 | Arenicellaceae       | 0.34  | 0.061 | Alteromonadaceae                   | 0.95  | 0.296 | Weeksellaceae                  | 1.18  | 0.435 |
| Shewanellaceae                 | 0.70  | 0.277 | Spongiibacteraceae   | 0.33  | 0.067 | Campylobacteraceae                 | 0.81  | 0.264 | Spongiibacteraceae             | 1.16  | 0.197 |
| Pseudoalteromonadaceae         | 0.65  | 0.182 | Nitrosopumilaceae    | 0.33  | 0.099 | Hyphomonadaceae                    | 0.80  | 0.217 | Shewanellaceae                 | 0.82  | 0.548 |
| Cellvibrionaceae               | 0.62  | 0.110 | Mycoplasmataceae     | 0.30  | 0.176 | uncl. $\gamma$ -proteobacteria     | 0.75  | 0.197 | Rhizobiaceae                   | 0.70  | 0.221 |
| Micavibrionaceae               | 0.44  | 0.148 | Blattabacteriaceae   | 0.26  | 0.232 | Thiotrichaceae                     | 0.72  | 0.217 | Colwelliaceae                  | 0.68  | 0.301 |
| Haliaceae                      | 0.43  | 0.073 | Shewanellaceae       | 0.24  | 0.087 | Mycobacteriaceae                   | 0.70  | 0.229 | Fusobacteriaceae               | 0.68  | 0.334 |
| Rubritaleaceae                 | 0.39  | 0.060 | Crocinitomicaceae    | 0.24  | 0.162 | $\gamma$ -proteobacteria inc. sed. | 0.65  | 0.156 | Haliaceae                      | 0.65  | 0.185 |
| Puniceicoccaceae               | 0.37  | 0.109 | Vibrionaceae         | 0.19  | 0.067 | uncl. MBAE14                       | 0.57  | 0.184 | Xanthomonadaceae               | 0.58  | 0.337 |
| Hyphomonadaceae                | 0.34  | 0.064 | Weeksellaceae        | 0.18  | 0.092 | Leptotrichiaceae                   | 0.56  | 0.182 | Cellvibrionaceae               | 0.56  | 0.115 |
| Lachnospiraceae                | 0.33  | 0.180 | Thiotrichaceae       | 0.17  | 0.072 | Mycoplasmataceae                   | 0.49  | 0.264 | Leptotrichiaceae               | 0.54  | 0.166 |

| PRE                    |       |       | TRANSITION             |       |       | HOLD                   |       |       | POST                    |       |       |
|------------------------|-------|-------|------------------------|-------|-------|------------------------|-------|-------|-------------------------|-------|-------|
| Genus                  | Mean  | SEM   | Genus                  | Mean  | SEM   | Genus                  | Mean  | SEM   | Genus                   | Mean  | SEM   |
| uncl. Rhodobacteraceae | 25.92 | 2.939 | uncl. Rhodobacteraceae | 28.44 | 6.597 | uncl. Rhodobacteraceae | 31.35 | 3.347 | uncl. Rhodobacteraceae  | 21.93 | 3.391 |
| Oleispira              | 15.18 | 3.816 | Psychrobacter          | 16.68 | 4.991 | Tenacibaculum          | 7.68  | 1.252 | Psychrobacter           | 10.46 | 3.365 |
| Tenacibaculum          | 9.44  | 1.740 | Oleispira              | 16.33 | 5.799 | Psychrobacter          | 6.55  | 1.591 | Tenacibaculum           | 9.47  | 2.315 |
| Psychrobacter          | 5.92  | 1.244 | Tenacibaculum          | 14.18 | 3.034 | Oleispira              | 5.99  | 1.740 | Actinobacillus          | 4.74  | 1.685 |
| HTCC5015               | 4.60  | 0.990 | uncultured             | 5.09  | 2.013 | Actinobacillus         | 4.29  | 1.039 | uncl. Flavobacteriaceae | 3.98  | 1.169 |

|                           |      |       |                            |      |       |                            |      |       |                            |      |       |
|---------------------------|------|-------|----------------------------|------|-------|----------------------------|------|-------|----------------------------|------|-------|
| uncl. Flavobacteriaceae   | 4.30 | 1.816 | Phocoenobacter             | 1.94 | 0.838 | uncl. Cardiobacteriaceae   | 3.22 | 0.700 | uncl. Cardiobacteriaceae   | 2.86 | 0.699 |
| uncl. Cardiobacteriaceae  | 3.80 | 1.148 | Pusillimonas               | 1.41 | 0.626 | uncl. Flavobacteriaceae    | 2.93 | 0.583 | uncl. Sphingomonadaceae    | 2.53 | 0.842 |
| Actinobacillus            | 2.32 | 1.125 | Cupriavidus                | 1.37 | 0.846 | HTCC5015                   | 1.72 | 0.463 | uncl. γ-proteobacteria     | 2.08 | 0.941 |
| uncult. γ-proteobacteria  | 1.94 | 0.486 | Oceanivirga                | 0.93 | 0.376 | Cupriavidus                | 1.70 | 0.249 | Campylobacter              | 1.75 | 1.231 |
| BD1-7 clade               | 1.89 | 0.389 | uncl. Saccharospirillaceae | 0.78 | 0.684 | Lewinella                  | 1.44 | 0.336 | uncl. MBAE14               | 1.57 | 0.329 |
| Arenicella                | 1.39 | 0.370 | Parahalia                  | 0.55 | 0.167 | Parahalia                  | 1.32 | 0.246 | uncl. Alteromonadaceae     | 1.53 | 0.428 |
| uncl. Alteromonadaceae    | 1.21 | 0.236 | uncl. Alteromonadaceae     | 0.51 | 0.104 | Fusobacterium              | 1.21 | 0.422 | HTCC5015                   | 1.44 | 0.335 |
| uncl. Gammaproteobacteria | 1.14 | 0.334 | Actinobacillus             | 0.50 | 0.093 | Colwellia                  | 1.13 | 0.651 | Phocoenobacter             | 1.36 | 0.714 |
| Ornithobacterium          | 0.73 | 0.306 | uncl. Burkholderiaceae     | 0.49 | 0.300 | uncl. Cellvibrionaceae     | 0.96 | 0.176 | Erythrobacter              | 1.12 | 0.295 |
| uncl. Rhizobiaceae        | 0.71 | 0.311 | Colwellia                  | 0.45 | 0.190 | Phocoenobacter             | 0.93 | 0.619 | Cupriavidus                | 1.09 | 0.142 |
| Lewinella                 | 0.69 | 0.147 | uncl. Cellvibrionaceae     | 0.42 | 0.167 | uncl. Alteromonadaceae     | 0.92 | 0.296 | BD1-7 clade                | 0.98 | 0.177 |
| Psychrobium               | 0.67 | 0.277 | Porphyromonas              | 0.39 | 0.271 | Campylobacter              | 0.81 | 0.264 | Oleispira                  | 0.89 | 0.421 |
| Pseudoalteromonas         | 0.65 | 0.182 | uncl. Saprospiraceae       | 0.35 | 0.114 | uncl. Saccharospirillaceae | 0.77 | 0.258 | Psychrobium                | 0.81 | 0.548 |
| uncl. Cellvibrionaceae    | 0.61 | 0.111 | uncl. Flavobacteriaceae    | 0.33 | 0.094 | uncl. γ-proteobacteria     | 0.75 | 0.197 | Lewinella                  | 0.78 | 0.289 |
| Erythrobacter             | 0.60 | 0.299 | Cand. Nitrosopumilus       | 0.33 | 0.099 | Aequorivita                | 0.72 | 0.673 | uncl. Saccharospirillaceae | 0.78 | 0.269 |
| Phocoenobacter            | 0.54 | 0.160 | Mycoplasma                 | 0.30 | 0.176 | Cocleimonas                | 0.72 | 0.217 | uncl. Hyphomonadaceae      | 0.70 | 0.195 |
| uncl. Saprospiraceae      | 0.52 | 0.145 | uncl. Sphingomonadaceae    | 0.26 | 0.108 | Mycobacterium              | 0.70 | 0.229 | Fusobacterium              | 0.68 | 0.334 |
| Mesonina                  | 0.50 | 0.229 | uncl. Blattabacteriaceae   | 0.26 | 0.232 | uncl. Saprospiraceae       | 0.68 | 0.147 | Ornithobacterium           | 0.67 | 0.279 |
| uncl. Micavibrionaceae    | 0.44 | 0.148 | BD1-7 clade                | 0.25 | 0.063 | Marinicella                | 0.63 | 0.156 | Paracoccus                 | 0.67 | 0.206 |
| Paracoccus                | 0.43 | 0.122 | Arenicella                 | 0.25 | 0.061 | uncl. Burkholderiaceae     | 0.61 | 0.089 | Colwellia                  | 0.67 | 0.301 |

Abbreviations: uncl., unclassified; uncul., uncultured.; Cand., Candidatus

**Table S4.** Mean relative abundance and the standard error of the mean for every taxonomic phyla, and the top 25 most abundant families, and genera within chuff microbial communities from each of the four water change phases.

| PRE                |       |        | TRANSITION         |       |       | HOLD               |       |        | POST               |       |       |
|--------------------|-------|--------|--------------------|-------|-------|--------------------|-------|--------|--------------------|-------|-------|
| Phylum             | Mean  | SEM    | Phylum             | Mean  | SEM   | Phylum             | Mean  | SEM    | Phylum             | Mean  | SEM   |
| Proteobacteria     | 37.37 | 2.129  | Proteobacteria     | 38.10 | 2.954 | Proteobacteria     | 35.81 | 1.927  | Proteobacteria     | 33.29 | 1.626 |
| Bacteroidetes      | 29.29 | 1.140  | Bacteroidetes      | 29.56 | 1.864 | Bacteroidetes      | 30.40 | 1.445  | Bacteroidetes      | 32.47 | 1.500 |
| Tenericutes        | 6.66  | 1.024  | Tenericutes        | 6.92  | 0.727 | Tenericutes        | 8.26  | 0.895  | Firmicutes         | 7.62  | 0.610 |
| Fusobacteria       | 6.97  | 0.732  | Firmicutes         | 6.63  | 0.595 | Epsilonbacteraeota | 6.76  | 0.436  | Tenericutes        | 7.16  | 0.868 |
| Epsilonbacteraeota | 7.04  | 0.450  | Fusobacteria       | 6.07  | 1.112 | Fusobacteria       | 6.35  | 0.633  | Epsilonbacteraeota | 6.41  | 0.431 |
| Firmicutes         | 4.77  | 0.370  | Epsilonbacteraeota | 5.12  | 0.577 | Firmicutes         | 5.38  | 0.317  | Fusobacteria       | 5.59  | 0.555 |
| Patescibacteria    | 3.85  | 0.235  | Patescibacteria    | 3.72  | 0.297 | Patescibacteria    | 2.95  | 0.165  | Patescibacteria    | 3.24  | 0.249 |
| Spirochaetes       | 2.76  | 0.198  | Spirochaetes       | 3.00  | 0.128 | Spirochaetes       | 2.88  | 0.262  | Spirochaetes       | 3.21  | 0.350 |
| Actinobacteria     | 0.91  | 0.154  | Actinobacteria     | 0.65  | 0.124 | Actinobacteria     | 0.85  | 0.111  | Actinobacteria     | 0.89  | 0.089 |
| uncl. Bacteria     | 0.37  | 0.113  | uncl. Bacteria     | 0.21  | 0.110 | uncl. Bacteria     | 0.35  | 0.133  | uncl. Bacteria     | 0.13  | 0.038 |
| Thaumarchaeota     | 0.01  | 0.003  | Thaumarchaeota     | 0.01  | 0.004 | Thaumarchaeota     | <0.01 | 0.002  | Planctomycetes     | <0.01 | 0.001 |
| Hydrogenedentes    | <0.01 | 0.001  |                    |       |       | Planctomycetes     | <0.01 | 0.001  | Dependentiae       | <0.01 | 0.001 |
| FBP                | <0.01 | 0.001  |                    |       |       | Cyanobacteria      | <0.01 | 0.001  |                    |       |       |
| Planctomycetes     | <0.01 | <0.001 |                    |       |       | Lentisphaerae      | <0.01 | <0.001 |                    |       |       |
| Nitrospirae        | <0.01 | <0.001 |                    |       |       |                    |       |        |                    |       |       |
| Dependentiae       | <0.01 | <0.001 |                    |       |       |                    |       |        |                    |       |       |
| Nitrospinae        | <0.01 | <0.001 |                    |       |       |                    |       |        |                    |       |       |

  

| PRE                  |       |       | TRANSITION           |       |       | HOLD                 |       |       | POST                 |       |       |
|----------------------|-------|-------|----------------------|-------|-------|----------------------|-------|-------|----------------------|-------|-------|
| Family               | Mean  | SEM   |
| Flavobacteriaceae    | 18.30 | 1.049 | Flavobacteriaceae    | 18.94 | 1.581 | Flavobacteriaceae    | 18.91 | 1.123 | Flavobacteriaceae    | 21.11 | 1.559 |
| Cardiobacteriaceae   | 16.93 | 0.870 | Cardiobacteriaceae   | 16.19 | 0.986 | Cardiobacteriaceae   | 15.35 | 0.810 | Cardiobacteriaceae   | 14.74 | 0.727 |
| Saccharospirillaceae | 12.46 | 0.879 | Saccharospirillaceae | 11.59 | 1.314 | Saccharospirillaceae | 12.17 | 0.911 | Saccharospirillaceae | 10.79 | 0.614 |



|                                   |      |       |                                   |      |       |                                   |      |       |                                   |      |       |
|-----------------------------------|------|-------|-----------------------------------|------|-------|-----------------------------------|------|-------|-----------------------------------|------|-------|
| Leptotrichiaceae                  | 6.81 | 0.728 | Mycoplasmataceae                  | 6.55 | 0.750 | Mycoplasmataceae                  | 7.85 | 0.892 | Mycoplasmataceae                  | 6.75 | 0.864 |
| Mycoplasmataceae                  | 6.27 | 1.027 | Leptotrichiaceae                  | 5.78 | 1.140 | Leptotrichiaceae                  | 5.87 | 0.630 | Leptotrichiaceae                  | 5.18 | 0.558 |
| Arcobacteraceae                   | 4.90 | 0.330 | Porphyromonadaceae                | 3.93 | 0.741 | Porphyromonadaceae                | 5.17 | 0.536 | Arcobacteraceae                   | 4.66 | 0.367 |
| Porphyromonadaceae                | 4.77 | 0.510 | Arcobacteraceae                   | 3.36 | 0.302 | Arcobacteraceae                   | 5.06 | 0.416 | Porphyromonadaceae                | 4.24 | 0.492 |
| Spirochaetaceae                   | 2.73 | 0.196 | Spirochaetaceae                   | 2.91 | 0.126 | Spirochaetaceae                   | 2.82 | 0.262 | Spirochaetaceae                   | 3.15 | 0.351 |
| Crocinitomicaceae                 | 2.64 | 0.376 | $\gamma$ -proteobacteria inc. sed | 2.65 | 0.813 | Crocinitomicaceae                 | 2.41 | 0.420 | Crocinitomicaceae                 | 2.51 | 0.457 |
| uncul. Gracilibacteria            | 2.23 | 0.117 | Crocinitomicaceae                 | 2.39 | 0.596 | Burkholderiaceae                  | 2.29 | 0.321 | Clostridiales Fam. XI             | 2.01 | 0.248 |
| Campylobacteraceae                | 2.14 | 0.177 | Burkholderiaceae                  | 2.29 | 0.563 | uncul. Gracilibacteria            | 1.73 | 0.087 | Clostridiales Fam. XII            | 1.95 | 0.241 |
| Moraxellaceae                     | 2.00 | 0.689 | uncul. Gracilibacteria            | 2.07 | 0.210 | Campylobacteraceae                | 1.70 | 0.154 | Burkholderiaceae                  | 1.89 | 0.306 |
| Burkholderiaceae                  | 2.00 | 0.379 | Clostridiales Fam. XI             | 1.85 | 0.239 | $\gamma$ -proteobacteria inc. sed | 1.60 | 0.294 | uncul. Gracilibacteria            | 1.85 | 0.166 |
| uncul. Absconditabacteriales      | 1.58 | 0.143 | Campylobacteraceae                | 1.77 | 0.380 | Weeksellaceae                     | 1.50 | 0.153 | Weeksellaceae                     | 1.76 | 0.224 |
| Weeksellaceae                     | 1.46 | 0.198 | Weeksellaceae                     | 1.68 | 0.396 | Clostridiales Fam. XI             | 1.46 | 0.180 | Campylobacteraceae                | 1.75 | 0.163 |
| $\gamma$ -proteobacteria inc. sed | 1.37 | 0.219 | Clostridiales Fam. XII            | 1.66 | 0.184 | Clostridiales Fam. XII            | 1.26 | 0.079 | Pasteurellaceae                   | 1.64 | 0.591 |
| Blattabacteriaceae                | 1.11 | 0.284 | Pasteurellaceae                   | 1.54 | 0.673 | Pasteurellaceae                   | 1.17 | 0.279 | uncul. Absconditabacteriales      | 1.32 | 0.108 |
| Clostridiales Fam. XI             | 1.10 | 0.134 | uncul. Absconditabacteriales      | 1.54 | 0.125 | Moraxellaceae                     | 1.15 | 0.165 | $\gamma$ -proteobacteria inc. sed | 1.27 | 0.276 |
| Clostridiales Fam. XII            | 1.07 | 0.071 | Moraxellaceae                     | 1.19 | 0.291 | uncul. Absconditabacteriales      | 1.13 | 0.094 | Moraxellaceae                     | 1.07 | 0.185 |
| Lachnospiraceae                   | 0.64 | 0.047 | Vibrionaceae                      | 0.95 | 0.548 | Blattabacteriaceae                | 1.09 | 0.199 | Lachnospiraceae                   | 0.99 | 0.126 |
| uncul. Clostridiales              | 0.63 | 0.081 | Blattabacteriaceae                | 0.78 | 0.189 | uncul. Clostridiales              | 0.65 | 0.074 | Blattabacteriaceae                | 0.85 | 0.171 |
| Pasteurellaceae                   | 0.47 | 0.102 | uncul. Clostridiales              | 0.73 | 0.100 | Lachnospiraceae                   | 0.63 | 0.049 | uncul. Clostridiales              | 0.77 | 0.117 |
| Actinomycetaceae                  | 0.46 | 0.092 | Lachnospiraceae                   | 0.65 | 0.093 | Defluviitaleaceae                 | 0.50 | 0.038 | Defluviitaleaceae                 | 0.71 | 0.053 |
| Defluviitaleaceae                 | 0.45 | 0.044 | Defluviitaleaceae                 | 0.64 | 0.114 | uncul. $\beta$ -proteobacteriales | 0.50 | 0.066 | uncul. Bacteroidales              | 0.67 | 0.182 |
| Sedimenticolaceae                 | 0.40 | 0.071 | uncul. $\gamma$ -proteobacteria   | 0.48 | 0.125 | Fusobacteriaceae                  | 0.48 | 0.197 | Actinomycetaceae                  | 0.66 | 0.076 |

  

| PRE                          |       |       | TRANSITION                   |       |       | HOLD                         |       |       | POST                         |       |       |
|------------------------------|-------|-------|------------------------------|-------|-------|------------------------------|-------|-------|------------------------------|-------|-------|
| Genus                        | Mean  | SEM   |
| uncul. Cardiobacteriaceae    | 15.87 | 0.826 | uncul. Cardiobacteriaceae    | 15.10 | 0.916 | uncul. Cardiobacteriaceae    | 14.41 | 0.746 | uncul. Cardiobacteriaceae    | 13.98 | 0.709 |
| uncul. Saccharospirillaceae  | 12.41 | 0.878 | uncul. Saccharospirillaceae  | 11.58 | 1.315 | uncul. Saccharospirillaceae  | 12.16 | 0.911 | Tenacibaculum                | 11.67 | 0.549 |
| Tenacibaculum                | 11.09 | 0.411 | Tenacibaculum                | 11.27 | 0.645 | Tenacibaculum                | 10.67 | 0.468 | uncul. Saccharospirillaceae  | 10.78 | 0.614 |
| Oceanivirga                  | 6.80  | 0.728 | Mycoplasma                   | 6.55  | 0.749 | Mycoplasma                   | 7.84  | 0.892 | uncul. Flavobacteriaceae     | 7.52  | 1.120 |
| Mycoplasma                   | 6.26  | 1.026 | uncul. Flavobacteriaceae     | 5.84  | 1.097 | uncul. Flavobacteriaceae     | 6.49  | 0.666 | Mycoplasma                   | 6.74  | 0.861 |
| uncul. Flavobacteriaceae     | 5.11  | 0.653 | Oceanivirga                  | 5.78  | 1.140 | Oceanivirga                  | 5.87  | 0.630 | Oceanivirga                  | 5.18  | 0.558 |
| Arcobacter                   | 4.90  | 0.330 | Porphyromonas                | 3.93  | 0.741 | Porphyromonas                | 5.17  | 0.536 | Arcobacter                   | 4.66  | 0.367 |
| Porphyromonas                | 4.77  | 0.510 | Arcobacter                   | 3.36  | 0.302 | Arcobacter                   | 5.06  | 0.416 | Porphyromonas                | 4.24  | 0.492 |
| Fluviicola                   | 2.64  | 0.376 | Marinicella                  | 2.64  | 0.813 | Fluviicola                   | 2.41  | 0.420 | Fluviicola                   | 2.51  | 0.457 |
| uncul. Gracilibacteria       | 2.23  | 0.117 | Fluviicola                   | 2.39  | 0.595 | Sediminispirochaeta          | 2.28  | 0.266 | Sediminispirochaeta          | 2.49  | 0.313 |
| Campylobacter                | 2.14  | 0.177 | Sediminispirochaeta          | 2.09  | 0.138 | uncul. Gracilibacteria       | 1.73  | 0.087 | Fusibacter                   | 1.90  | 0.236 |
| Gangjinia                    | 2.00  | 0.214 | uncul. bacterium             | 2.07  | 0.210 | uncul. Burkholderiaceae      | 1.71  | 0.317 | uncul. Gracilibacteria       | 1.85  | 0.166 |
| Sediminispirochaeta          | 1.89  | 0.202 | Campylobacter                | 1.77  | 0.380 | Campylobacter                | 1.70  | 0.154 | Helcococcus                  | 1.77  | 0.250 |
| Psychrobacter                | 1.82  | 0.554 | Gangjinia                    | 1.73  | 0.541 | Marinicella                  | 1.60  | 0.294 | Gangjinia                    | 1.77  | 0.300 |
| uncul. Absconditabacteriales | 1.58  | 0.143 | Fusibacter                   | 1.62  | 0.175 | Gangjinia                    | 1.60  | 0.268 | Campylobacter                | 1.75  | 0.163 |
| Marinicella                  | 1.37  | 0.220 | Helcococcus                  | 1.60  | 0.254 | Helcococcus                  | 1.30  | 0.179 | uncul. Burkholderiaceae      | 1.33  | 0.287 |
| uncul. Burkholderiaceae      | 1.28  | 0.381 | uncul. Absconditabacteriales | 1.54  | 0.125 | Fusibacter                   | 1.23  | 0.077 | uncul. Absconditabacteriales | 1.32  | 0.108 |
| uncul. Blattabacteriaceae    | 1.11  | 0.284 | uncul. Burkholderiaceae      | 1.49  | 0.598 | uncul. Absconditabacteriales | 1.13  | 0.094 | Marinicella                  | 1.27  | 0.276 |
| Fusibacter                   | 1.04  | 0.068 | Actinobacillus               | 1.26  | 0.661 | Psychrobacter                | 1.10  | 0.162 | Actinobacillus               | 1.19  | 0.581 |
| Ornithobacterium             | 1.02  | 0.100 | Psychrobacter                | 1.16  | 0.280 | Ornithobacterium             | 1.09  | 0.142 | Ornithobacterium             | 1.13  | 0.195 |

|                       |      |       |                     |      |       |                          |      |       |                          |      |       |
|-----------------------|------|-------|---------------------|------|-------|--------------------------|------|-------|--------------------------|------|-------|
| Helcococcus           | 0.97 | 0.123 | Vibrio              | 0.95 | 0.548 | uncl. Blautabacteriaceae | 1.09 | 0.199 | Psychrobacter            | 0.97 | 0.162 |
| Treponema 2           | 0.84 | 0.097 | Suttonella          | 0.91 | 0.201 | Actinobacillus           | 0.80 | 0.266 | uncl. Lachnospiraceae    | 0.94 | 0.125 |
| Suttonella            | 0.82 | 0.115 | uncl. Weeksellaceae | 0.89 | 0.325 | Suttonella               | 0.77 | 0.104 | uncl. Blautabacteriaceae | 0.85 | 0.171 |
| uncl. Clostridiales   | 0.63 | 0.081 | Treponema           | 0.82 | 0.100 | uncl. Clostridiales      | 0.65 | 0.074 | uncl. Clostridiales      | 0.77 | 0.117 |
| uncl. Lachnospiraceae | 0.62 | 0.047 | Ornithobacterium    | 0.79 | 0.111 | uncl. Lachnospiraceae    | 0.60 | 0.050 | UCG-011                  | 0.71 | 0.053 |

Abbreviations: uncl., unclassified; uncul., uncultured.; Cand., Candidatus

**Table S5.** Mean relative abundance and the standard error of the mean for every taxonomic phyla, and the top 25 most abundant families, and genera within fecal microbial communities from each of the four water change phases.

| PRE                |       |       | TRANSITION         |       |       | HOLD               |       |       | POST               |       |       |
|--------------------|-------|-------|--------------------|-------|-------|--------------------|-------|-------|--------------------|-------|-------|
| Phylum             | Mean  | SEM   |
| Proteobacteria     | 38.65 | 2.875 | Proteobacteria     | 37.32 | 4.436 | Proteobacteria     | 40.70 | 2.375 | Proteobacteria     | 45.62 | 3.343 |
| Firmicutes         | 22.92 | 1.881 | Firmicutes         | 23.77 | 3.293 | Firmicutes         | 17.57 | 1.896 | Fusobacteria       | 17.18 | 2.593 |
| Fusobacteria       | 18.08 | 2.602 | Epsilonbacteraeota | 18.25 | 5.189 | Fusobacteria       | 15.17 | 1.782 | Epsilonbacteraeota | 15.09 | 2.837 |
| Epsilonbacteraeota | 13.30 | 2.438 | Fusobacteria       | 14.40 | 3.352 | Epsilonbacteraeota | 13.03 | 2.218 | Firmicutes         | 15.02 | 1.661 |
| Actinobacteria     | 5.76  | 1.147 | Actinobacteria     | 4.63  | 0.842 | Actinobacteria     | 12.49 | 2.578 | Actinobacteria     | 6.35  | 1.654 |
| Bacteroidetes      | 1.24  | 0.458 | Bacteroidetes      | 1.59  | 0.744 | Bacteroidetes      | 0.93  | 0.196 | Bacteroidetes      | 0.67  | 0.173 |
| Tenericutes        | 0.06  | 0.020 | Tenericutes        | 0.04  | 0.014 | Tenericutes        | 0.10  | 0.026 | uncl. Bacteria     | 0.04  | 0.037 |
| Thaumarchaeota     | 0.00  | 0.001 | Planctomycetes     | 0.00  | 0.004 | Patescibacteria    | 0.01  | 0.004 | Tenericutes        | 0.04  | 0.016 |
| Patescibacteria    | 0.00  | 0.001 | Patescibacteria    | 0.00  | 0.001 | Spirochaetes       | 0.00  | 0.001 | Spirochaetes       | 0.00  | 0.002 |
| uncl. Bacteria     | 0.00  | 0.001 | Spirochaetes       | 0.00  | 0.001 | uncl. Bacteria     | 0.00  | 0.001 | Patescibacteria    | 0.00  | 0.001 |
| Spirochaetes       | 0.00  | 0.001 |                    |       |       | Planctomycetes     | 0.00  | 0.000 | Thaumarchaeota     | 0.00  | 0.000 |
| Planctomycetes     | 0.00  | 0.001 |                    |       |       |                    |       |       |                    |       |       |
| Nitrospirae        | 0.00  | 0.000 |                    |       |       |                    |       |       |                    |       |       |

| PRE                   |       |       | TRANSITION            |       |       | HOLD                  |       |       | POST                   |       |       |
|-----------------------|-------|-------|-----------------------|-------|-------|-----------------------|-------|-------|------------------------|-------|-------|
| Family                | Mean  | SEM   | Family                | Mean  | SEM   | Family                | Mean  | SEM   | Family                 | Mean  | SEM   |
| Pasteurellaceae       | 35.55 | 3.388 | Pasteurellaceae       | 34.06 | 4.480 | Pasteurellaceae       | 39.21 | 2.480 | Pasteurellaceae        | 38.68 | 3.563 |
| Fusobacteriaceae      | 18.06 | 2.599 | Campylobacteraceae    | 18.24 | 5.189 | Fusobacteriaceae      | 15.15 | 1.783 | Fusobacteriaceae       | 17.17 | 2.593 |
| Campylobacteraceae    | 13.28 | 2.438 | Fusobacteriaceae      | 14.27 | 3.367 | Campylobacteraceae    | 13.01 | 2.218 | Campylobacteraceae     | 15.08 | 2.837 |
| Lachnospiraceae       | 6.96  | 1.081 | Lachnospiraceae       | 8.94  | 1.948 | Mycobacteriaceae      | 12.45 | 2.578 | Mycobacteriaceae       | 6.35  | 1.654 |
| Ruminococcaceae       | 5.82  | 0.815 | Ruminococcaceae       | 6.97  | 1.807 | Lachnospiraceae       | 5.41  | 0.878 | Vibrionaceae           | 5.08  | 1.676 |
| Mycobacteriaceae      | 5.73  | 1.149 | Mycobacteriaceae      | 4.61  | 0.844 | Peptostreptococcaceae | 4.04  | 0.674 | Lachnospiraceae        | 4.30  | 0.548 |
| Clostridiaceae 1      | 4.82  | 0.608 | Clostridiaceae 1      | 3.82  | 0.782 | Clostridiaceae 1      | 3.75  | 0.400 | Peptostreptococcaceae  | 4.09  | 0.700 |
| Peptostreptococcaceae | 4.28  | 0.508 | Peptostreptococcaceae | 2.59  | 0.300 | Ruminococcaceae       | 3.26  | 0.439 | Ruminococcaceae        | 3.21  | 0.757 |
| Succinivibrionaceae   | 1.11  | 0.376 | Erysipelotrichaceae   | 1.41  | 0.392 | Erysipelotrichaceae   | 0.98  | 0.164 | Clostridiaceae 1       | 2.32  | 0.252 |
| Enterobacteriaceae    | 1.07  | 0.393 | Vibrionaceae          | 1.28  | 0.833 | Succinivibrionaceae   | 0.51  | 0.172 | Erysipelotrichaceae    | 1.05  | 0.139 |
| Erysipelotrichaceae   | 1.00  | 0.260 | Succinivibrionaceae   | 0.96  | 0.335 | Bacteroidaceae        | 0.50  | 0.113 | Succinivibrionaceae    | 0.86  | 0.388 |
| Bacteroidaceae        | 0.60  | 0.170 | Rikenellaceae         | 0.67  | 0.367 | Enterobacteriaceae    | 0.28  | 0.046 | Enterobacteriaceae     | 0.46  | 0.118 |
| Rikenellaceae         | 0.45  | 0.224 | Bacteroidaceae        | 0.57  | 0.283 | Rikenellaceae         | 0.27  | 0.107 | Rikenellaceae          | 0.27  | 0.109 |
| Desulfovibrionaceae   | 0.26  | 0.098 | Enterobacteriaceae    | 0.38  | 0.135 | Vibrionaceae          | 0.23  | 0.095 | Bacteroidaceae         | 0.26  | 0.064 |
| Burkholderiaceae      | 0.18  | 0.075 | Burkholderiaceae      | 0.34  | 0.119 | Burkholderiaceae      | 0.17  | 0.062 | Desulfovibrionaceae    | 0.22  | 0.098 |
| Prevotellaceae        | 0.14  | 0.068 | Prevotellaceae        | 0.20  | 0.107 | Cardiobacteriaceae    | 0.11  | 0.021 | Cardiobacteriaceae     | 0.12  | 0.024 |
| Vibrionaceae          | 0.13  | 0.055 | Cardiobacteriaceae    | 0.13  | 0.034 | Flavobacteriaceae     | 0.11  | 0.043 | Flavobacteriaceae      | 0.09  | 0.038 |
| Cellvibrionaceae      | 0.12  | 0.013 | Leptotrichiaceae      | 0.13  | 0.077 | Desulfovibrionaceae   | 0.09  | 0.030 | Saccharosporillaceae   | 0.07  | 0.012 |
| Rhodobacteraceae      | 0.09  | 0.012 | Flavobacteriaceae     | 0.11  | 0.061 | uncl. RF39            | 0.07  | 0.025 | Burkholderiaceae       | 0.05  | 0.015 |
| Mycoplasmataceae      | 0.04  | 0.019 | Saccharosporillaceae  | 0.06  | 0.019 | Saccharosporillaceae  | 0.06  | 0.013 | uncl. Bacteria         | 0.04  | 0.037 |
| Arenicellaceae        | 0.04  | 0.007 | Desulfovibrionaceae   | 0.06  | 0.027 | Lactobacillaceae      | 0.06  | 0.018 | Moraxellaceae          | 0.03  | 0.013 |
| Atopobiaceae          | 0.03  | 0.014 | uncl. RF39            | 0.03  | 0.014 | vadinBB60             | 0.03  | 0.016 | Mycoplasmataceae       | 0.03  | 0.016 |
| Cardiobacteriaceae    | 0.03  | 0.009 | Lactobacillaceae      | 0.02  | 0.017 | Mycoplasmataceae      | 0.03  | 0.009 | Rhodobacteraceae       | 0.02  | 0.008 |
| Moraxellaceae         | 0.02  | 0.019 | Crocinitomicaceae     | 0.02  | 0.016 | Porphyromonadaceae    | 0.03  | 0.010 | uncl. γ-proteobacteria | 0.02  | 0.018 |
| Flavobacteriaceae     | 0.02  | 0.008 | Arenicellaceae        | 0.01  | 0.009 | Rubrobacteriaceae     | 0.02  | 0.023 | Prevotellaceae         | 0.02  | 0.010 |

| PRE            |       |       | TRANSITION     |       |       | HOLD           |       |       | POST           |       |       |
|----------------|-------|-------|----------------|-------|-------|----------------|-------|-------|----------------|-------|-------|
| Genus          | Mean  | SEM   |
| Actinobacillus | 35.54 | 3.388 | Actinobacillus | 34.01 | 4.469 | Actinobacillus | 39.21 | 2.480 | Actinobacillus | 38.68 | 3.563 |
| Fusobacterium  | 18.06 | 2.599 | Campylobacter  | 18.24 | 5.189 | Fusobacterium  | 15.15 | 1.783 | Fusobacterium  | 16.99 | 2.595 |
| Campylobacter  | 13.28 | 2.438 | Fusobacterium  | 14.26 | 3.368 | Campylobacter  | 13.01 | 2.218 | Campylobacter  | 15.08 | 2.837 |
| Mycobacterium  | 5.73  | 1.149 | Mycobacterium  | 4.61  | 0.844 | Mycobacterium  | 12.45 | 2.578 | Mycobacterium  | 6.35  | 1.654 |

|                              |      |       |                              |      |       |                              |      |       |                              |      |       |
|------------------------------|------|-------|------------------------------|------|-------|------------------------------|------|-------|------------------------------|------|-------|
| Clostridium sensu stricto 1  | 3.68 | 0.509 | Blautia                      | 2.97 | 1.382 | Clostridium sensu stricto 1  | 2.46 | 0.311 | Photobacterium               | 5.08 | 1.676 |
| Peptoclostridium             | 2.40 | 0.442 | Clostridium sensu stricto 1  | 2.15 | 0.308 | Lachnoclostridium            | 1.96 | 0.322 | Clostridium sensu stricto 1  | 1.58 | 0.205 |
| Epulopiscium                 | 2.39 | 1.010 | Hydrogenoanaerobacterium     | 1.99 | 1.020 | Peptoclostridium             | 1.43 | 0.391 | Lachnoclostridium            | 1.41 | 0.329 |
| Lachnoclostridium            | 1.71 | 0.348 | Lachnoclostridium            | 1.93 | 0.721 | Clostridium sensu stricto 13 | 1.30 | 0.240 | Peptoclostridium             | 1.26 | 0.423 |
| Ruminiclostridium 9          | 1.63 | 0.434 | Clostridium sensu stricto 13 | 1.67 | 0.578 | Tyzzereella 3                | 1.24 | 0.469 | Ruminiclostridium 9          | 1.14 | 0.548 |
| Clostridium sensu stricto 13 | 1.15 | 0.187 | Photobacterium               | 1.28 | 0.833 | Ruminiclostridium 9          | 1.21 | 0.307 | Paeniclostridium             | 1.02 | 0.382 |
| Anaerobiospirillum           | 1.11 | 0.376 | Epulopiscium                 | 1.27 | 0.639 | Epulopiscium                 | 0.97 | 0.300 | Romboutsia                   | 1.01 | 0.414 |
| UCG-005                      | 1.04 | 0.394 | Ruminiclostridium 9          | 1.12 | 0.353 | Romboutsia                   | 0.97 | 0.316 | Tyzzereella 3                | 0.89 | 0.261 |
| Hydrogenoanaerobacterium     | 0.98 | 0.331 | Peptoclostridium             | 1.00 | 0.269 | Paeniclostridium             | 0.65 | 0.186 | Anaerobiospirillum           | 0.86 | 0.388 |
| Proteus                      | 0.91 | 0.387 | Tyzzereella 3                | 0.98 | 0.321 | Hydrogenoanaerobacterium     | 0.57 | 0.133 | Epulopiscium                 | 0.79 | 0.329 |
| Blautia                      | 0.81 | 0.211 | UCG-005                      | 0.97 | 0.387 | Paraclostridium              | 0.52 | 0.176 | Clostridium sensu stricto 13 | 0.74 | 0.145 |
| GCA-900066225                | 0.80 | 0.180 | Anaerobiospirillum uncl.     | 0.96 | 0.335 | Anaerobiospirillum           | 0.51 | 0.172 | UCG-005                      | 0.69 | 0.282 |
| fissicatena group            | 0.76 | 0.237 | Ruminococcaceae              | 0.92 | 0.389 | Bacteroides                  | 0.50 | 0.113 | Blautia                      | 0.67 | 0.215 |
| Tyzzereella 3                | 0.61 | 0.142 | fissicatena group            | 0.68 | 0.266 | Turicibacter                 | 0.46 | 0.135 | Turicibacter                 | 0.61 | 0.128 |
| Bacteroides                  | 0.60 | 0.170 | Alistipes                    | 0.67 | 0.367 | Blautia                      | 0.43 | 0.139 | Paraclostridium              | 0.36 | 0.160 |
| Paraclostridium              | 0.55 | 0.251 | Oscillospira                 | 0.65 | 0.227 | fissicatena group            | 0.43 | 0.102 | GCA-900066225                | 0.33 | 0.090 |
| Tyzzereella                  | 0.47 | 0.134 | uncl. Lachnospiraceae        | 0.60 | 0.207 | UCG-005                      | 0.37 | 0.126 | Hydrogenoanaerobacterium     | 0.32 | 0.088 |
| Romboutsia                   | 0.46 | 0.138 | Bacteroides                  | 0.57 | 0.283 | Erysipelatoclostridium       | 0.33 | 0.111 | fissicatena group            | 0.30 | 0.081 |
| Alistipes                    | 0.45 | 0.224 | Romboutsia                   | 0.54 | 0.180 | Tyzzereella                  | 0.30 | 0.041 | Proteus                      | 0.27 | 0.118 |
| uncl. Ruminococcaceae        | 0.45 | 0.133 | Tyzzereella                  | 0.50 | 0.178 | Alistipes                    | 0.27 | 0.107 | Alistipes                    | 0.27 | 0.109 |
| Fournierella                 | 0.44 | 0.191 | Turicibacter                 | 0.47 | 0.219 | GCA-900066225                | 0.27 | 0.051 | Bacteroides                  | 0.26 | 0.064 |

Abbreviations: uncl., unclassified; uncul., uncultured.; Cand., Candidatus
